# Supplementary material
Source: HighWire-hosted journal article supplement (https://bmjopen.bmj.com/content/6/9/e012371)
Supplement: inline-supplementary-material-1 [file inline-supplementary-material-1.pdf]

**Supplemental Table 1. Adjusted eligibility criteria**

|                                 | <b>First protocol</b> | <b>Amended protocol</b> |
|---------------------------------|-----------------------|-------------------------|
| Age                             | 18-80 yrs             | 18-85 yrs               |
| Weight                          | ≤ 100 kg (220 lb)     | ≤ 115 kg (253 lb)       |
| Time-window of sepsis diagnosis | < 72 h                | < 96 h                  |
| Time-window of AKI diagnosis    | < 24 h                | < 48 h                  |

AKI, acute kidney injury.
